# Supplementary material
Source: PubMed Central journal article supplement (PMC9935230)
Supplement: inf-42-252-s001.pdf [file inf-42-252-s001.pdf]

**Supplemental Material**

**Supplemental Table 1.** Characteristics and vaccination status of children with a history of COVID-19 who were COVID-19 vaccine-eligible<sup>1</sup> at time of interview and/or chart abstraction, N=70

|                                                                                                       | Vaccinated,<br>n, (%)<br>(n=34) | Unvaccinated,<br>n, (%)<br>(n=36) | P value <sup>2</sup> |
|-------------------------------------------------------------------------------------------------------|---------------------------------|-----------------------------------|----------------------|
| Age group (years) <sup>3</sup>                                                                        |                                 |                                   |                      |
| 5-11                                                                                                  | 0 (0)                           | 7 (19)                            | 0.021                |
| 12-15                                                                                                 | 6 (18)                          | 8 (22)                            | 0.863                |
| 16-20 <sup>4</sup>                                                                                    | 28 (82)                         | 21 (58)                           | 0.053                |
| Sex                                                                                                   |                                 |                                   |                      |
| Male                                                                                                  | 14 (41)                         | 11 (31)                           | 0.354                |
| Race/Ethnicity <sup>5</sup>                                                                           |                                 |                                   |                      |
| Hispanic                                                                                              | 11 (32)                         | 10 (28)                           | 0.516                |
| Non-Hispanic Black                                                                                    | 11 (32)                         | 15 (42)                           | 0.336                |
| Non-Hispanic White                                                                                    | 9 (26)                          | 10 (28)                           | 0.821                |
| Non-Hispanic Other Race <sup>6</sup>                                                                  | 1 (3)                           | 1 (3)                             | 1.000                |
| Location                                                                                              |                                 |                                   |                      |
| Institution 1                                                                                         | 24 (71)                         | 22 (61)                           | 0.404                |
| Institution 2                                                                                         | 10 (29)                         | 12 (33)                           | 0.724                |
| Institution 3                                                                                         | 0 (0)                           | 2 (6)                             | 0.163                |
| Underlying medical conditions                                                                         |                                 |                                   |                      |
| None                                                                                                  | 2 (6)                           | 4 (11)                            | 0.435                |
| Obesity                                                                                               | 22 (65)                         | 20 (56)                           | 0.435                |
| Other <sup>7</sup>                                                                                    | 19 (56)                         | 23 (64)                           | 0.293                |
| Severity of previous MIS-C illness                                                                    |                                 |                                   |                      |
| Cardiac MIS-C involvement <sup>8</sup>                                                                | 2 (6)                           | 1 (3)                             | 0.609                |
| Intensive care unit admission                                                                         | 6 (18)                          | 6 (17)                            | 0.913                |
| Life support <sup>9</sup>                                                                             | 3 (9)                           | 5 (14)                            | 0.711                |
| Median hospital length of stay, days (IQR)                                                            | 4.5 (3-9)                       | 4.5 (2-9)                         | 0.719                |
| Median time from COVID-19 hospital discharge to initial interview for those interviewed, months (IQR) | 16 (15-22)                      | 15 (9–15)                         | p=0.26               |

<sup>1</sup>Defined as age  $\geq 12$  years if interviewed or abstracted before 11/2/21 and age  $\geq 5$  years if interviewed or abstracted on or after 11/2/21. For those interviewed, date of most recent interview used to calculate eligibility.

<sup>2</sup>Chi square or Fisher's Exact two-sided P value if cell  $< 5$  for categorical variables; Kruskal-Wallis for continuous variables

<sup>3</sup>Age calculated at time of most recent interview or chart abstraction

<sup>4</sup>One person included in this age group was hospitalized at age 20 but was age 22 at time of interview and abstraction

<sup>5</sup>Race and/or ethnicity unknown for 2 individuals in vaccinated group

<sup>6</sup>Other race = Asian, multiple

<sup>7</sup>Conditions in the vaccinated group: chronic lung disease (n=9, one also with an immunocompromising condition, one with neurofibromatosis, one with an immunocompromising condition and seizures, one with type 1 diabetes, one with fatty liver, one with developmental delay and tracheostomy dependence, and one with sickle cell disease);

scoliosis (n=1), immunocompromising conditions (n=2), congenital heart disease (n=2, one also with seizures), intellectual disability and seizures (n=1), cerebral palsy, seizures, and hydrocephalus (n=1), type 2 diabetes (n=3, one also with Prader Willi syndrome and obstructive sleep apnea, and one also with panhypopituitarism, hypothyroidism, adrenal insufficiency, and obstructive sleep apnea). Conditions in the unvaccinated group: chronic lung disease (n=11, one also with developmental delay, one with an immunocompromising condition, congenital heart disease, and obstructive sleep apnea, one with type 1 diabetes mellitus, seizures, and congenital malformation, and one also with an immunocompromising condition and seizures), immunocompromising condition (n=8, one also with Zellweger syndrome, two with seizures, one with seizures and global developmental delay, one with type 1 diabetes mellitus, one person with Myeloperoxidase-ANCA Vasculitis and end stage renal disease on peritoneal dialysis, and one person status post lung transplant), type 1 diabetes mellitus (n=2, one also with asthma), sickle cell disease (n=1), cerebral palsy, seizures, and tracheostomy dependence (n=1).

<sup>8</sup>Cardiac involvement defined as congestive heart failure, myocarditis, pericarditis noted in the chart or the any of the following echocardiogram findings: coronary aneurysm, coronary artery dilation, or cardiac dysfunction.

<sup>9</sup>Life support was defined by receipt of vasopressors, intubation/mechanical ventilation, or extracorporeal membranous oxygenation (ECMO)

**Supplemental Table 2.** COVID-19 vaccine data for children hospitalized for MIS-C or COVID-19 and subsequently vaccinated.

|                                                                         | MIS-C,<br>n, (%)<br>(n=51) | Acute COVID-19,<br>n, (%)<br>(n=34) |
|-------------------------------------------------------------------------|----------------------------|-------------------------------------|
| # Vaccine doses                                                         |                            |                                     |
| 1                                                                       | 6 (12)                     | 6 (18)                              |
| 2                                                                       | 39 (76)                    | 25 (74)                             |
| >2                                                                      | 6 (12)                     | 3 (9)                               |
| Vaccine manufacturer                                                    |                            |                                     |
| Pfizer-BioNTech                                                         | 46 (90)                    | 24 (71)                             |
| Moderna                                                                 | 2 (4)                      | 5 (15)                              |
| Unknown                                                                 | 3 (6)                      | 5 (15)                              |
| Time from hospital discharge to first vaccine dose,<br>median mo. (IQR) | 10 (6-13)                  | 9 (8-12)                            |
